# Supplementary material
Source: MDPI journal article supplement (https://www.mdpi.com/2073-4433/9/9/355)
Supplement: s1 [file s1]

## Supplementary Materials

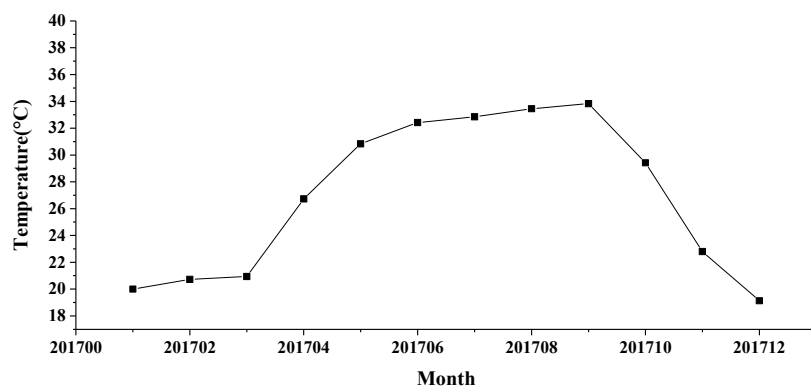

**Figure S1.** Monthly averaged temperature over Nanjing (capital of GX) in the year 2017.

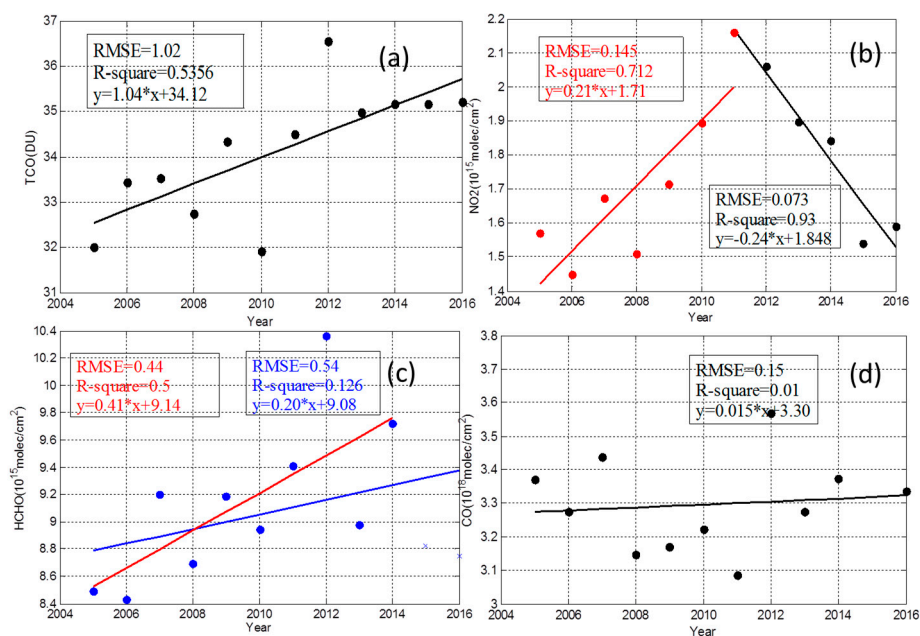

**Figure S2.** Annual average and long trend of TCO and its precursors. The fitting lines are within 95% confidence intervals. (a) TCO(DU), (b) NO<sub>2</sub>(10<sup>15</sup> molec/cm<sup>2</sup>), the red line represents the trend of 2005–2012, the black line represents the trend of 2012–2016, (c) HCHO (10<sup>15</sup> molec/cm<sup>2</sup>), the red line represents the trend of 2005–2014, the black line represents the trend of 2005–2016, and (d) CO (10<sup>18</sup> molec/cm<sup>2</sup>).
